# Supplementary material for: Efficient capture of PM2.5by intertwined tubular conjugated microporous polymer-based filters with high stability in a humid environment
Source: Royal Society of Chemistry journal article supplement (doi:10.1039/d0ta11908c), 2021-01-01
Supplement: d0ta11908c1.pdf [file d0ta11908c1.pdf]

## Supplementary Information

### **Efficient capture of PM<sub>2.5</sub> by intertwined tubular conjugated microporous polymers-based filters with high stability in humidity environment**

*Zhuoyue Tian<sup>a</sup>, Yang Lei<sup>a</sup>, Yukang Fan<sup>a</sup>, Peilei Zhou<sup>a</sup>, Fang Liu<sup>a</sup>, Zhaoqi Zhu<sup>a</sup>, Hanxue Sun<sup>a</sup>,*

*Weidong Liang<sup>a</sup>, An Li<sup>a\*</sup>*

<sup>a</sup>College of Petrochemical Technology, Lanzhou University of Technology, Langongping Road 287,

Lanzhou 730050, P. R. China

\*Corresponding author: Prof. Dr. An Li, Tel.: +86-931-7823125. Fax: +86-931-7823125.

E-mail address: [lian2010@lut.cn](mailto:lian2010@lut.cn) (A. Li)

## Characterization

The morphology of the CMPs was taken on Scanning electron microscope (SEM JSM-6701F) and Transmission electron microscope (TEM Tecnai G2TF20). The morphology of the samples was taken on scanning electron microscope (TESCAN MIRA3) equipped with an energy dispersive spectroscopy (EDS) under a vacuum environment. The specific surface area and porosity of the as prepared CMPs was measured by N<sub>2</sub> adsorption and desorption at 77.3 K using a volumetric sorption analyzer (micromeritics ASAP 2020). Before analysis, the samples were degassed at 120 °C for 12 h under vacuum. XPS spectra were measured using a Physical Electronics 5000 Versa Probe II Scanning ESCA (XPS) Microprobe. The X-ray diffraction (XRD) was performed on a RigakuD/Max-2400 diffractometer with 2θ at 2° to 80°. Water contact angle (CA) measurement was performed on a contact angle meter OCA20 (Dataphysics, Germany). The visualization of the sample was recorded by Photons Fastcam Mini UX100 type high speed video camera. TGA analysis was carried out using a STA 6000 (PerkinElmer Instrument Co., Ltd. USA) to investigate thermal stability of the samples over a temperature range of 25 to 800 °C at a rate of 5 °C min<sup>-1</sup> under N<sub>2</sub> atmosphere. The mechanical properties of samples were measured using a universal testing machine (CMT4304, Shenzhen SANS Test Machine Co. Ltd., Shenzhen, China) equipped with a 50 N load cell at room temperature. The tests were performed with a gauge length of 50 mm and a loading speed of 10 mm min<sup>-1</sup>.

## PM removal test

The PM removal test was tested by the dust particle counter (CEM DT-9850M).

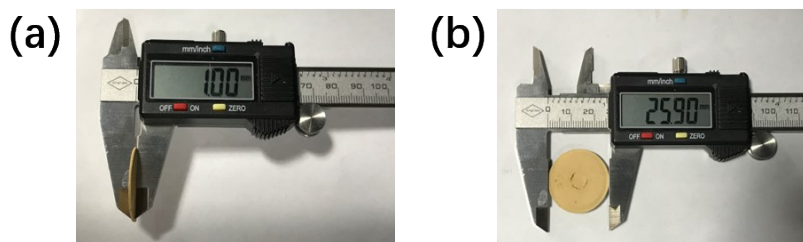

Figure S1. (a) Photograph of the thickness of a sample measured with a vernier caliper, showing the thickness of 1mm. (b) Photograph of the diameter of the sample measured with a vernier caliper, showing a diameter of 25.90mm.

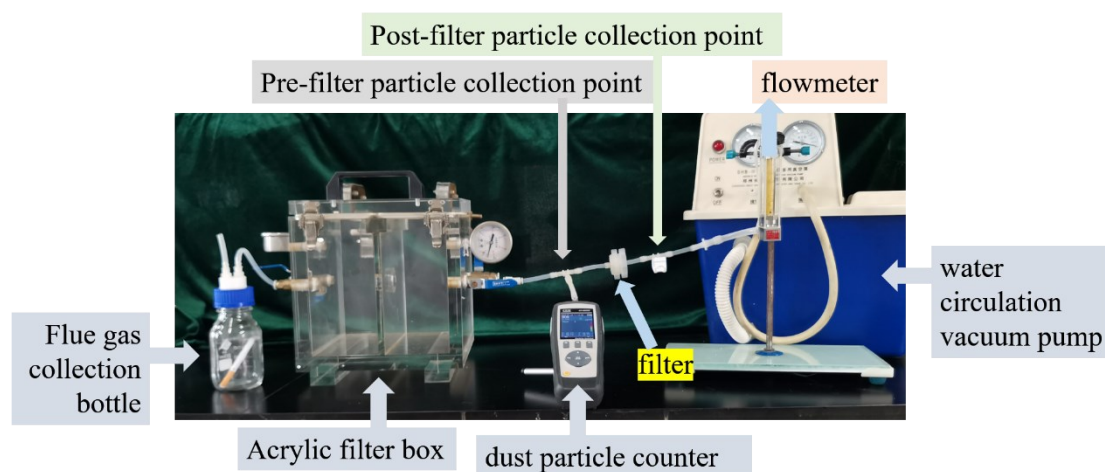

Figure S2. Physical photographs of the flue gas collection and filtration system.

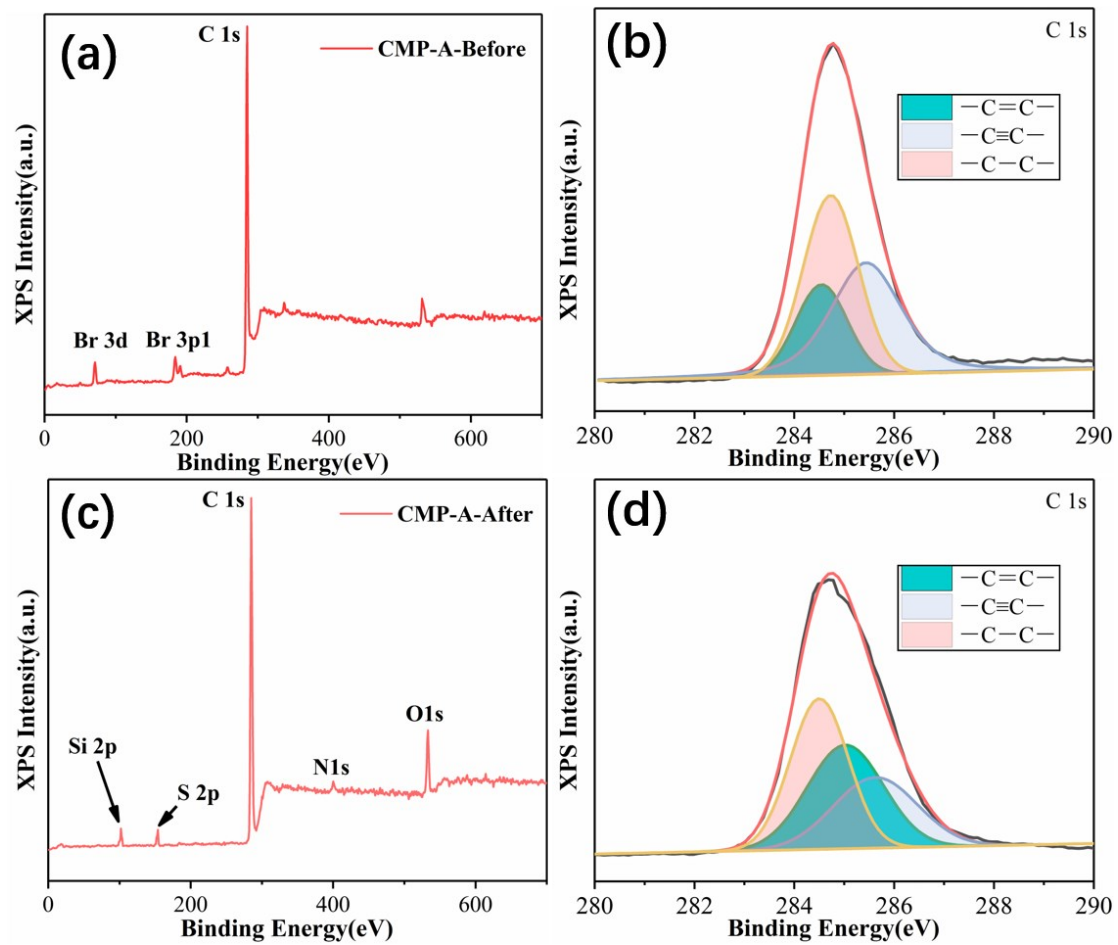

Figure S3. (a) The survey spectrum of CMP-As before filtration. (b) The C1s spectrum of CMP-As before filtration. (c) The survey spectrum of CMP-As after filtration. (d) The C1s spectrum of CMP-As after filtration.

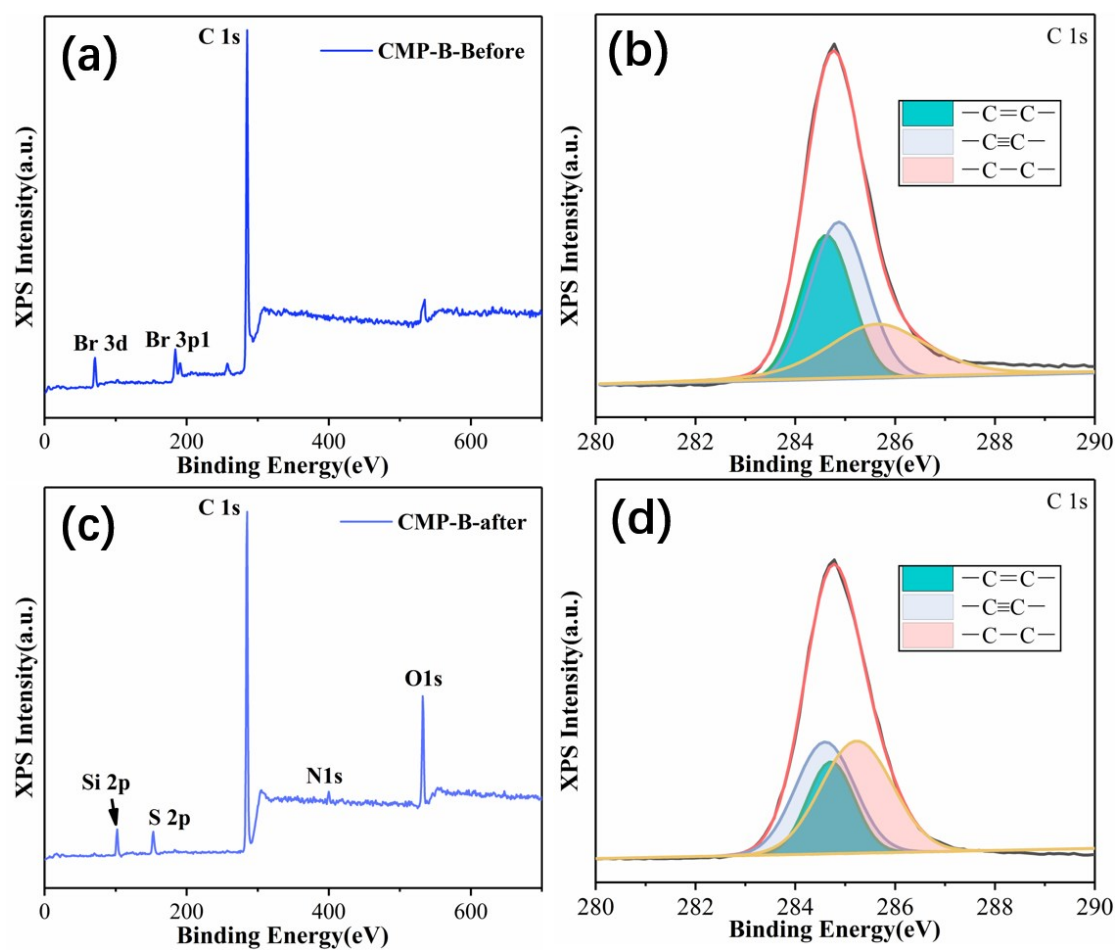

Figure S4. (a) The survey spectrum of CMP-Bs before filtration. (b) The C1s spectrum of CMP-Bs before filtration. (c) The survey spectrum of CMP-Bs after filtration. (d) The C1s spectrum of CMP-Bs after filtration.

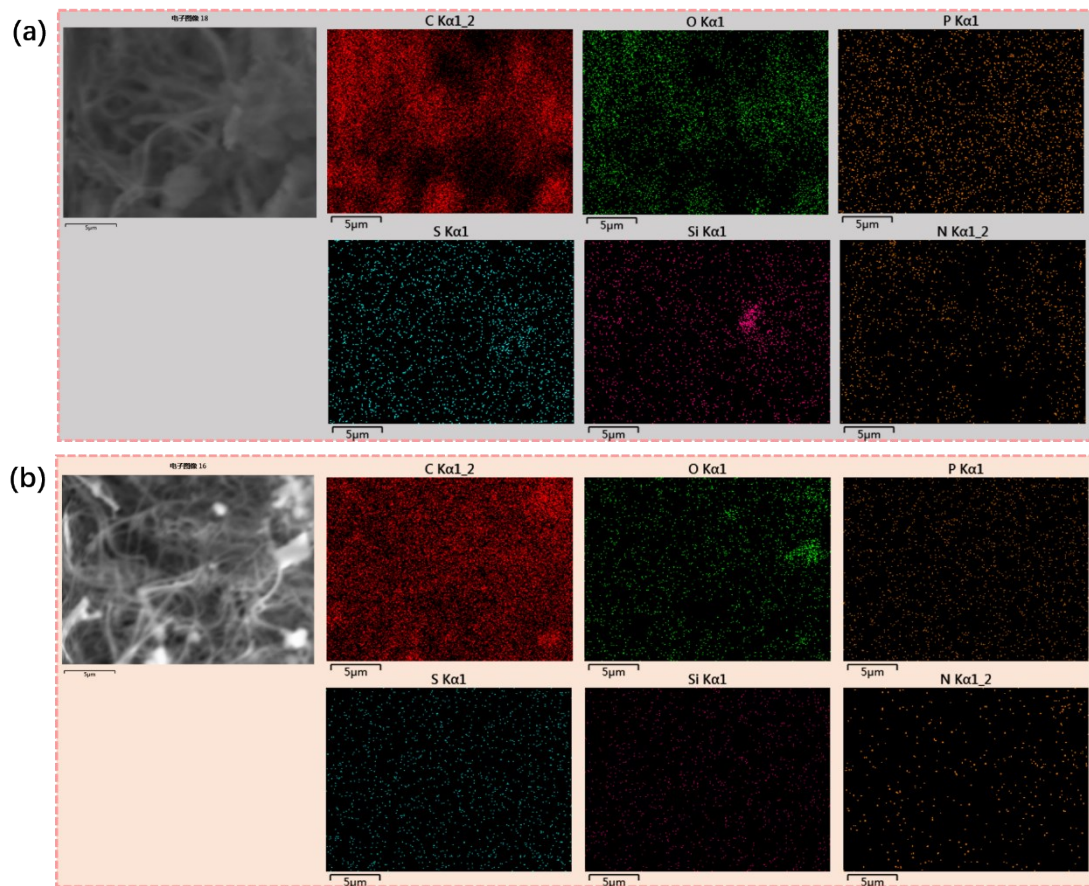

Figure S5. (a) EDS photographs of distribution of elements for C, O, P, S, Si and N on the surface of CMP-As after filtration. (b) EDS photographs of distribution of elements for C, O, P, S, Si and N on the surface of CMP-As after washing.



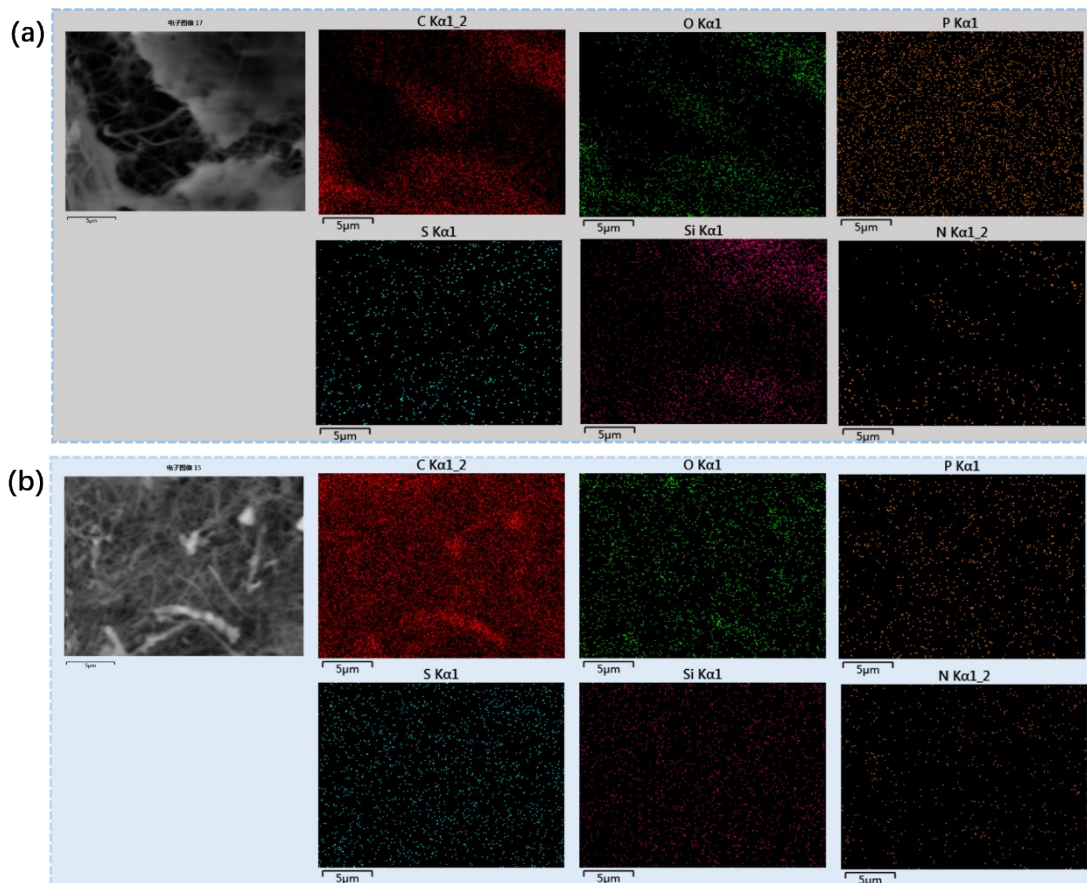

Figure S6. (a) EDS photographs of distribution of elements for C, O, P, S, Si and N on the surface of CMP-Bs after filtration. (b) EDS photographs of distribution of elements for C, O, P, S, Si and N on the surface of CMP-Bs after washing.

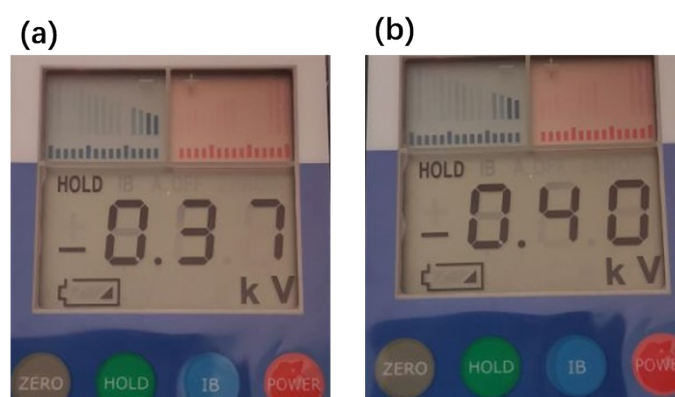

Figure S7. (a) The photograph of electrostatic force image for CMP-As. (b) The photograph of electrostatic force image for CMP-Bs.

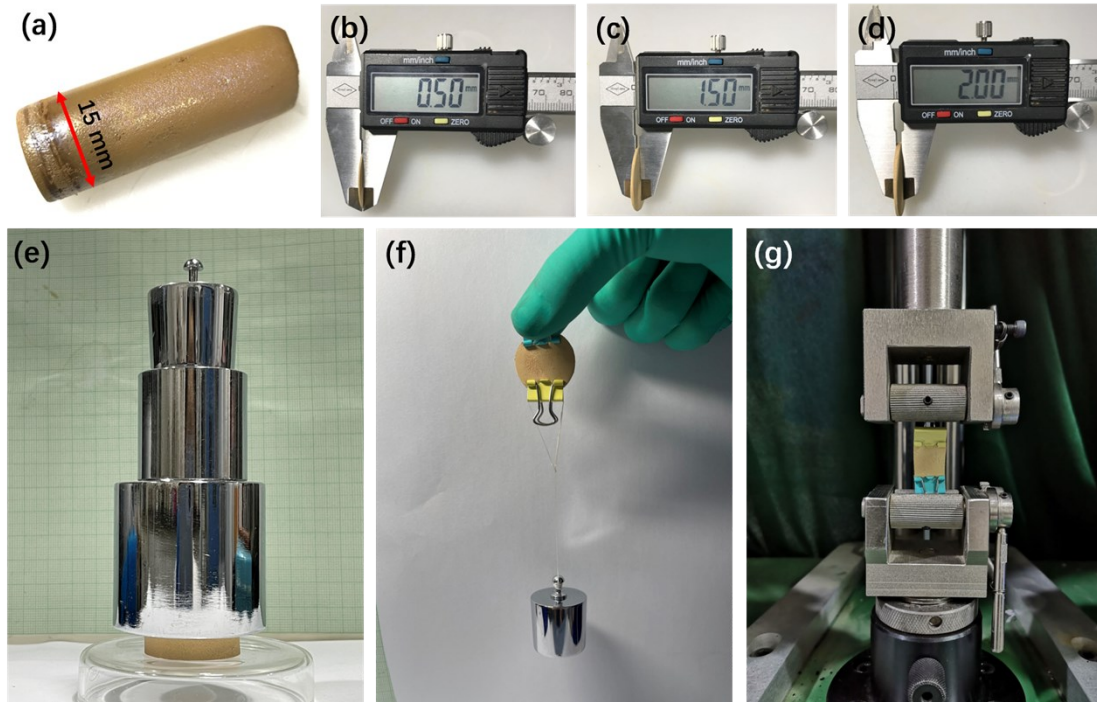

Figure S8. (a) Photograph of CMPs with a shape of column. (b~d) Photographs of CMPs filters with thickness of 0.5 mm, 1.5 mm and 2 mm. (e) Photograph of CMPs based blocks can withstand a weight of 800 g and still maintain the original appearance. (f) Photograph of CMPs based filter can trice a weight of 100 g easily. (g) Photograph of CMPs base filter in tensile test.

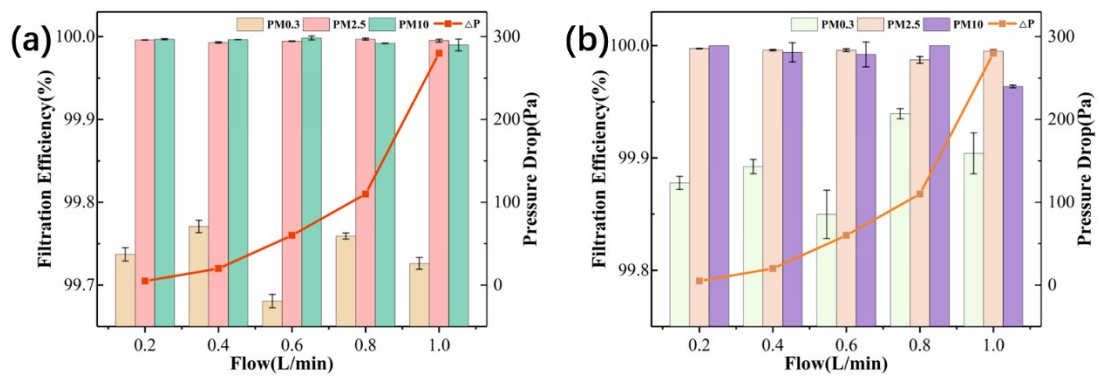

Figure S9. (a) The filtration efficiency and pressure drop of CMP-A's with different flow. (b) The filtration efficiency and pressure drop of CMP-B's with different flow.



Table S1. Quality factor of CMP-As and CMP-Bs in different flow rates.

| folw (L/min) | QF of CMP-As      |                   |                  | QF of CMP-Bs      |                   |                  |
|--------------|-------------------|-------------------|------------------|-------------------|-------------------|------------------|
|              | PM <sub>0.3</sub> | PM <sub>2.5</sub> | PM <sub>10</sub> | PM <sub>0.3</sub> | PM <sub>2.5</sub> | PM <sub>10</sub> |
| 0.2          | 1.19              | 2.03              | 2.08             | 1.34              | 2.10              | 1.91             |
| 0.4          | 0.30              | 0.48              | 0.51             | 0.34              | 0.51              | 0.49             |
| 0.6          | 0.10              | 0.16              | 0.18             | 0.11              | 0.17              | 0.16             |
| 0.8          | 0.05              | 0.09              | 0.09             | 0.07              | 0.08              | 0.08             |
| 1            | 0.02              | 0.04              | 0.03             | 0.02              | 0.04              | 0.03             |

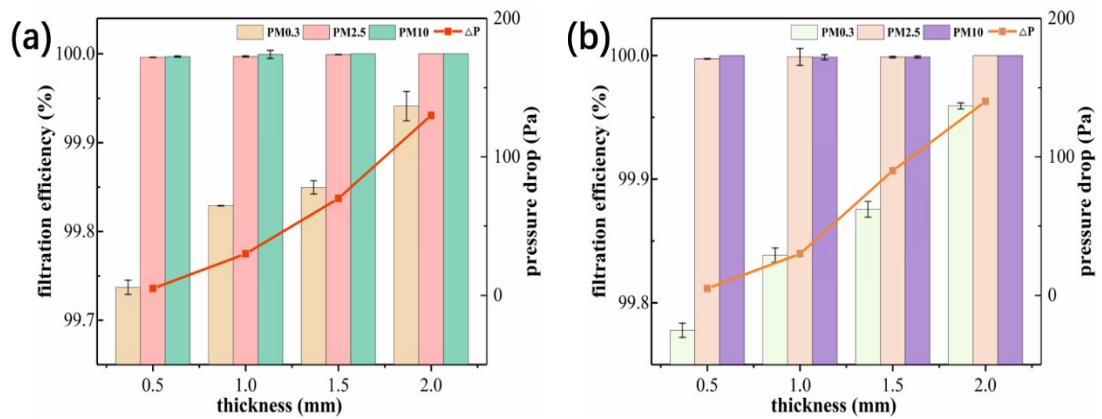

Figure S10. (a) The filtration efficiency and pressure drop of CMP-As with different thickness. (b)

The filtration efficiency and pressure drop of CMP-Bs with different thickness.

Table S2. Quality factor of CMP-As and CMP-Bs with different thickness.

| thickness (mm) | QF of CMP-As      |                   |                  | QF of CMP-Bs      |                   |                  |
|----------------|-------------------|-------------------|------------------|-------------------|-------------------|------------------|
|                | PM <sub>0.3</sub> | PM <sub>2.5</sub> | PM <sub>10</sub> | PM <sub>0.3</sub> | PM <sub>2.5</sub> | PM <sub>10</sub> |
| 0.5            | 1.19              | 2.03              | 2.08             | 1.22              | 2.10              | 1.91             |
| 1.0            | 0.21              | 0.35              | 0.29             | 0.21              | 0.38              | 0.37             |
| 1.5            | 0.09              | 0.17              | 0.17             | 0.07              | 0.13              | 0.13             |
| 2              | 0.06              | 0.11              | 0.09             | 0.06              | 0.10              | 0.08             |
